# Supplementary material
Source: HighWire-hosted journal article supplement (https://molpharm.aspetjournals.org/highwire/filestream/86036/field_highwire_adjunct_files/0/67_supp_data.pdf)
Supplement: 67_supp_data.pdf [file 67_supp_data.pdf]

## Supplemental Data MOLPHARM-AR-2020-000067

### A benzodiazepine ligand with improved GABA<sub>A</sub> receptor $\alpha$ 5-subunit-selectivity driven by interactions with loop C

Xenia Simeone\*, Filip Koniuszewski, Markus Müllegger, Andreas Smetka, Friederike Steudle, Roshan Puthenkalam, Margot Ernst<sup>§</sup>, Petra Scholze<sup>§</sup>

#### Supplemental Figure 1: Nomenclature of mutated subunits and sequence alignment

Supplemental Figure 1 shows the sequences of rat  $\alpha$ 3 and  $\alpha$ 5 subunits, as published by UniProtKB (accession IDs P20236 and P19969). The point mutated amino acids are highlighted in yellow. In the structural work, amino acids of the mature protein are counted without the signal peptide, while in the mutational analysis, amino acids are counted including the signal peptide. In addition a full alignment of human  $\alpha$ 1,  $\alpha$ 3 and  $\alpha$ 5 subunits is shown to support Figure 3 in the manuscript.

#### GBRA3\_RAT (P20236) signal peptide (SP): 28 amino acids

|             |            |            |            |            |                   |
|-------------|------------|------------|------------|------------|-------------------|
| 10          | 20         | 30         | 40         | 50         |                   |
| MITTQMWHFY  | VTRVGLLLLI | SILPGTTGQG | ESRRQEPGDF | VKQDIGGLSP |                   |
| 60          | 70         | 80         | 90         | 100        |                   |
| KHAPDIPDDS  | TDNITIFTRI | LDRLLDGYDN | RLRPLGDAV  | TEVKTDIYVT |                   |
| 110         | 120        | 130        | 140        | 150        |                   |
| SFGPVSDDTM  | EYTIDVFFRQ | TWHDRLKFD  | GPMKILPLNN | LLASKIWTPD |                   |
| 160         | 170        | 180        | 190        | 200        |                   |
| TFFHNGKKS   | AHNMTTPNKL | LRLVDNGTLL | YTMRLTIHAE | CPMHLEDFPM | T215 (with Sp)    |
| 210         | 220        | 230        | 240        | 250        | T187 (without Sp) |
| DVHACPLKFG  | SYAYTKAEVI | YSWTLGKNKS | VEVAQDGSRL | NQYDLLGHVV |                   |
| 260         | 270        | 280        | 290        | 300        | S257 (with Sp)    |
| GTEIIRSGSTG | EYVVMTHFH  | LKRKIGYFVI | QTYLPCIMTV | ILSQVSFWLN | S229 (without Sp) |
| 310         | 320        | 330        | 340        | 350        |                   |
| RESVPARTVF  | GVTTVLMTT  | LSISARNSLP | KVAYATAMDW | FMAVCYAFVF |                   |
| 360         | 370        | 380        | 390        | 400        |                   |
| SALIEFATVN  | YFTKRSWAVE | GKKVPEALEM | KKKTPAAPTK | KTSTTFNIVG |                   |
| 410         | 420        | 430        | 440        | 450        |                   |
| TTYPINLALD  | TEFSTISKAA | AAPSASSTPT | VIASPKTTYV | QDSPAETKTY |                   |
| 460         | 470        | 480        | 490        |            |                   |
| NSVSKVDKIS  | RIIFPVLF   | FNLVYWATYV | NRESAIKGM  | RKQ        |                   |

#### GBRA5\_RAT (P19969) Signal peptide: 25 amino acids

|             |            |            |             |             |                   |
|-------------|------------|------------|-------------|-------------|-------------------|
| 10          | 20         | 30         | 40          | 50          |                   |
| MDNGMLSRFI  | MTKTLVFCI  | SMTLSHF    | SQMPSTSSVQD | ETNDNITIFT  |                   |
| 60          | 70         | 80         | 90          | 100         |                   |
| RILDGLLDGY  | DNRLRPGLGE | RITQVRTDIY | VTSFGPVSDDT | EMEYTTIDVFF |                   |
| 110         | 120        | 130        | 140         | 150         |                   |
| RQSWKDERLR  | FKGPMQRLPL | NNLLASKIWT | PDTFFHNGKK  | SIAHNMTTPN  | P197 (with Sp)    |
| 160         | 170        | 180        | 190         | 200         | P172 (without Sp) |
| KLLRLEDDGT  | LLYTMRLTIS | AECPMQLEDF | PMDAHACPLK  | FGSYAYP     |                   |
| 210         | 220        | 230        | 240         | 250         | T239 (with Sp)    |
| VVYVWTNGST  | KSVVVAEDGS | RLNQYHLMGQ | TVGTENIS    | TGEYTIMTAH  | T214 (without Sp) |
| 260         | 270        | 280        | 290         | 300         |                   |
| FHLKRKIGYF  | VIQTYLPCIM | TVILSQVSFW | LNRESVPART  | VFGVTTVLTM  |                   |
| 310         | 320        | 330        | 340         | 350         |                   |
| TTLISISARNS | LPKVAYATAM | DWFIACVYAF | VFSALIEFAT  | VNYFTKRGWA  |                   |
| 360         | 370        | 380        | 390         | 400         |                   |
| WDGKKALEEA  | KIKKKERELI | LNKSTNAFTT | GKLTHPPNIP  | KEQLPGGTGN  |                   |
| 410         | 420        | 430        | 440         | 450         |                   |
| AVGTASIRAS  | EEKTSESKKT | YNSISKIDKM | SRIVFPILFG  | TFNLVYWATY  |                   |
| 460         |            |            |             |             |                   |
| LNREPVIKGA  | TSPK       |            |             |             |                   |

**Full alignment of human  $\alpha 1$ ,  $\alpha 3$  and  $\alpha 5$  subunits**

```

                                     ..*:*:*****
hgABRa1 -----QFSLDRLKDNITVPRILDRLLDGYDNRRLPGLGRRVTVKTDIFVTSFGPVSDHDMETIIVVFRQSWKDRLLFKGEMTVLRRLNMLMASKIWPDPDTPFRNGKKSVAHNMTPFNKLLRLEDDGT
a1Rat_28-455 -----QFSLDRLKDNITVPRILDRLLDGYDNRRLPGLGRRVTVKTDIFVTSFGPVSDHDMETIIVVFRQSWKDRLLFKGEMTVLRRLNMLMASKIWPDPDTPFRNGKKSVAHNMTPFNKLLRLEDDGT
hgABRa5 -----SHFGFSQMPSTSSVQDEENNITIFTRILDGLLDGYDNRRLPGLGRRITQVRDIYVTSFGPVSDTMEYTIIVVFRQSWKDRLLFKGEMTVLRRLNMLLASKIWPDPDTPFRNGKKSIAHNMTPFNKLLRLEDDGT
a5Rat_26-464 -----SHFGFSQMPSTSSVQDEENNITIFTRILDGLLDGYDNRRLPGLGRRITQVRDIYVTSFGPVSDTMEYTIIVVFRQSWKDRLLFKGEMTVLRRLNMLLASKIWPDPDTPFRNGKKSIAHNMTPFNKLLRLEDDGT
hgABRa3 QGESRRRQPGDFVKQDIGGLSPKHADIPDSDTNDITIFTRILDRLLDGYDNRRLPGLGDVAVKTKDIYVTSFGPVSDTMEYTIIVVFRQSWHDERLKFDPGPKILPLNLLASKIWPDPDTPFRNGKKSVAHNMTPFNKLLRLEVINGT
a3Rat_29-493 QGESRRRQPGDFVKQDIGGLSPKHADIPDSDTNDITIFTRILDRLLDGYDNRRLPGLGDVAVKTKDIYVTSFGPVSDTMEYTIIVVFRQSWHDERLKFDPGPKILPLNLLASKIWPDPDTPFRNGKKSVAHNMTPFNKLLRLEVINGT
1.....10.....20.....30.....40.....50.....60.....70.....80.....90.....100.....110.....120.....130.....140.....150

*****
hgABRa1 LLYTMRLTVRAECPMHLLEDPPMDAHAQPLKFGSYAYTRAEVVVEWIREPARSVVVAEDGSRILNQYDLLGQTVDSGIVQSSSTGEYVVMTHPFLKRRIGYFVIQTYLPCIMTVILSQVSWFLNRESVPARTVPGVTVLIMTILSISARNS
a1Rat_28-455 LLYTMRLTVRAECPMHLLEDPPMDAHAQPLKFGSYAYTRAEVVVEWIREPARSVVVAEDGSRILNQYDLLGQTVDSGIVQSSSTGEYVVMTHPFLKRRIGYFVIQTYLPCIMTVILSQVSWFLNRESVPARTVPGVTVLIMTILSISARNS
hgABRa5 LLYTMRLTVRAECPMHLLEDPPMDAHAQPLKFGSYAYPNSEVVVVMNGSTKSVVVAEDGSRILNQYHLMGQTVGTENISTSTGEYIMTAHPFLKRRIGYFVIQTYLPCIMTVILSQVSWFLNRESVPARTVPGVTVLIMTILSISARNS
a5Rat_26-464 LLYTMRLTVRAECPMHLLEDPPMDAHAQPLKFGSYAYPNSEVVVVMNGSTKSVVVAEDGSRILNQYHLMGQTVGTENISTSTGEYIMTAHPFLKRRIGYFVIQTYLPCIMTVILSQVSWFLNRESVPARTVPGVTVLIMTILSISARNS
hgABRa3 LLYTMRLTVRAECPMHLLEDPPMDVHAQPLKFGSYAYTTAEVVVSWLGGKNSVEVAEDGSRILNQYDLLGHVVGTEIIRSESGEYVVMTHPFLKRRIGYFVIQTYLPCIMTVILSQVSWFLNRESVPARTVPGVTVLIMTILSISARNS
a3Rat_29-493 LLYTMRLTVRAECPMHLLEDPPMDVHAQPLKFGSYAYTTAEVVVSWLGGKNSVEVAEDGSRILNQYDLLGHVVGTEIIRSESGEYVVMTHPFLKRRIGYFVIQTYLPCIMTVILSQVSWFLNRESVPARTVPGVTVLIMTILSISARNS
.....160.....170.....180.....190.....200.....210.....220.....230.....240.....250.....260.....270.....280.....290.....300

*****
hgABRa1 LPKVAYATAMDFPIAVCYAPVFSALIEPATVNYPTKRGYAWDGR-SVVPKPKRVKDFLIK--KNTVAPTASVTPHLARGDPGLATIAKSE-----ATIEPKVKP-ETKPPSP--KKTFNSSVKRIDRLSRIAPPLLEPGIFHLVYWA
a1Rat_28-455 LPKVAYATAMDFPIAVCYAPVFSALIEPATVNYPTKRGYAWDGR-SVVPKPKRVKDFLIK--KNTVAPTASVTPHLARGDPGLATIAKSE-----ATIEPKVKP-ETKPPSP--KKTFNSSVKRIDRLSRIAPPLLEPGIFHLVYWA
hgABRa5 LPKVAYATAMDFPIAVCYAPVFSALIEPATVNYPTKRGWAWGKKALBAKIKKK-REVLNKSNAFTPKKSGHPPIPK-FOPPAGTS-----NMT-FVSVVPEKETSSE--KKTYSNSIKIDKMSRIVFPVLPQPHLVYWA
a5Rat_26-464 LPKVAYATAMDFPIAVCYAPVFSALIEPATVNYPTKRGWAWGKKALBAKIKKKREELINKSTNAPTQGLKHPPIPK-QLPQGGT-----NAVGTASIRASEKTSSE--KKTYSNSIKIDKMSRIVFPVLPQPHLVYWA
hgABRa3 LPKVAYATAMDFPIAVCYAPVFSALIEPATVNYPTKRSWAWGKKVPALEMKKKTTPAAPAKKTSSTFNIVGTTVPINLAK-ETEPSTISKGA-AAPASSTETIIASPKATVQDSPTETKTYNSVSKVKDISRIIPVLPALPHLVYWA
a3Rat_29-493 LPKVAYATAMDFPIAVCYAPVFSALIEPATVNYPTKRSWAWGKKVPALEMKKKTTPAAPAKKTSSTFNIVGTTVPINLAK-ETEPSTISKAAAAPASSTETVVIASPKATVQDSPTETKTYNSVSKVKDISRIIPVLPALPHLVYWA
.....310.....320.....330.....340.....350.....360.....370.....380.....390.....400.....410.....420.....430.....440.....450

**:*:
hgABRa1 TYLNREPOLKAPPHQ
a1Rat_28-455 TYLNREPO-----
hgABRa5 TYLNREPVIKGASPK
a5Rat_26-464 TYLNREPVIKGASPK
hgABRa3 TYVHRESAIGHIRKQ
a3Rat_29-493 TYVHRESAIGHIRKQ
.....460.....

```

### **Supplemental Tables 1 and 2: Comparison of rat and human subunits**

Throughout our manuscript, amino acids are counted with the signal peptide included and based on the rat sequences. In some published studies, human sequences are used and/or the signal peptide is not counted, and the first amino acid of the mature peptide numbered as “1”. In Table 1 the different length of the signaling peptides is shown, in Table 2 the amino acids analyzed in this study are compared between rat and human sequence.

#### **Table 1: Length of signaling peptide**

Length of the signaling peptide as published by UniProtKB (accession IDs P62813, P20236, P19969, P14867, P34903, and P31644)

|            | rat | human |
|------------|-----|-------|
| $\alpha 1$ | 27  | 27    |
| $\alpha 3$ | 28  | 28    |
| $\alpha 5$ | 25  | 31    |

#### **Table 2: Summary of the homologous amino acids in Loops B and C**

|                   | rat<br>with signal peptide | rat<br>without signal peptide | human<br>with signal peptide | human<br>without signal peptide |
|-------------------|----------------------------|-------------------------------|------------------------------|---------------------------------|
| $\alpha 1$ B-loop | T 189                      | T 162                         | T 190                        | T 163                           |
| $\alpha 3$ B-loop | T 215                      | T 187                         | T 215                        | T 187                           |
| $\alpha 5$ B-loop | P 197                      | P 172                         | P 197                        | P 166                           |
| $\alpha 1$ C-loop | S 232                      | S 205                         | S 232                        | S 205                           |
| $\alpha 3$ C-loop | S 257                      | S 229                         | S 257                        | S 229                           |
| $\alpha 5$ C-loop | T 239                      | T 214                         | T 239                        | T 208                           |

#### **Supplemental Figure 2: Detailed statistical analyses of SH53d-acid and SH53d-ester binding to mutated receptors**

Membranes from transfected HEK 293 cells were incubated with 5 nM [<sup>3</sup>H]Ro 15-4513 in the presence of various concentrations of SH53d-acid or SH53d-ester. The concentrations resulting in half maximal inhibition of radioligand binding were converted into K<sub>i</sub> values by using the Cheng-Prusoff relationship and the respective K<sub>D</sub> values given in Table 3 of the main manuscript. One-way ANOVA followed by Tukey's multiple comparisons test was performed using GraphPad Prism version 8.3.0 for Mac OS X, GraphPad Software, La Jolla, California, USA, [www.graphpad.com](http://www.graphpad.com).

SH53d-acid  
statistical analysis

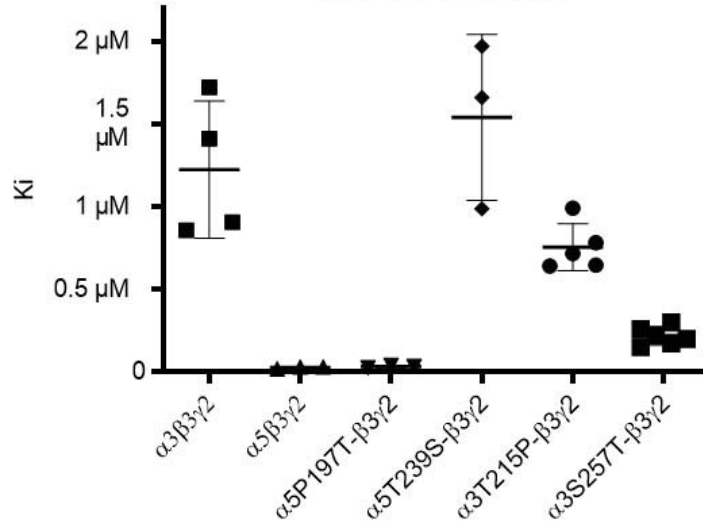

| Tukey's multiple comparisons test                                   | Mean Diff.  | 95.00% CI of diff.         | Significant? | Summary | Adjusted P Value |
|---------------------------------------------------------------------|-------------|----------------------------|--------------|---------|------------------|
| $\alpha 3\beta 3\gamma 2$ vs. $\alpha 5\beta 3\gamma 2$             | 1.197e-006  | 5.916e-007 to 1.802e-006   | Yes          | ****    | <0.0001          |
| $\alpha 3\beta 3\gamma 2$ vs. $\alpha 5P197T-\beta 3\gamma 2$       | 1.191e-006  | 5.861e-007 to 1.796e-006   | Yes          | ****    | <0.0001          |
| $\alpha 3\beta 3\gamma 2$ vs. $\alpha 5T239S-\beta 3\gamma 2$       | -3.163e-007 | -9.215e-007 to 2.888e-007  | No           | ns      | 0.5720           |
| $\alpha 3\beta 3\gamma 2$ vs. $\alpha 3T215P-\beta 3\gamma 2$       | 4.684e-007  | -6.312e-008 to 9.999e-007  | No           | ns      | 0.1030           |
| $\alpha 3\beta 3\gamma 2$ vs. $\alpha 3S257T-\beta 3\gamma 2$       | 1.006e-006  | 4.949e-007 to 1.518e-006   | Yes          | ****    | <0.0001          |
| $\alpha 5\beta 3\gamma 2$ vs. $\alpha 5P197T-\beta 3\gamma 2$       | -5.500e-009 | -6.524e-007 to 6.414e-007  | No           | ns      | >0.9999          |
| $\alpha 5\beta 3\gamma 2$ vs. $\alpha 5T239S-\beta 3\gamma 2$       | -1.513e-006 | -2.160e-006 to -8.662e-007 | Yes          | ****    | <0.0001          |
| $\alpha 5\beta 3\gamma 2$ vs. $\alpha 3T215P-\beta 3\gamma 2$       | -7.284e-007 | -1.307e-006 to -1.498e-007 | Yes          | **      | 0.0092           |
| $\alpha 5\beta 3\gamma 2$ vs. $\alpha 3S257T-\beta 3\gamma 2$       | -1.905e-007 | -7.507e-007 to 3.698e-007  | No           | ns      | 0.8829           |
| $\alpha 5P197T-\beta 3\gamma 2$ vs. $\alpha 5T239S-\beta 3\gamma 2$ | -1.508e-006 | -2.155e-006 to -8.607e-007 | Yes          | ****    | <0.0001          |
| $\alpha 5P197T-\beta 3\gamma 2$ vs. $\alpha 3T215P-\beta 3\gamma 2$ | -7.229e-007 | -1.302e-006 to -1.443e-007 | Yes          | **      | 0.0098           |
| $\alpha 5P197T-\beta 3\gamma 2$ vs. $\alpha 3S257T-\beta 3\gamma 2$ | -1.850e-007 | -7.452e-007 to 3.753e-007  | No           | ns      | 0.8947           |
| $\alpha 5T239S-\beta 3\gamma 2$ vs. $\alpha 3T215P-\beta 3\gamma 2$ | 7.847e-007  | 2.061e-007 to 1.363e-006   | Yes          | **      | 0.0048           |
| $\alpha 5T239S-\beta 3\gamma 2$ vs. $\alpha 3S257T-\beta 3\gamma 2$ | 1.323e-006  | 7.624e-007 to 1.883e-006   | Yes          | ****    | <0.0001          |
| $\alpha 3T215P-\beta 3\gamma 2$ vs. $\alpha 3S257T-\beta 3\gamma 2$ | 5.379e-007  | 5.815e-008 to 1.018e-006   | Yes          | *       | 0.0230           |

### SH53d-ester statistical analysis

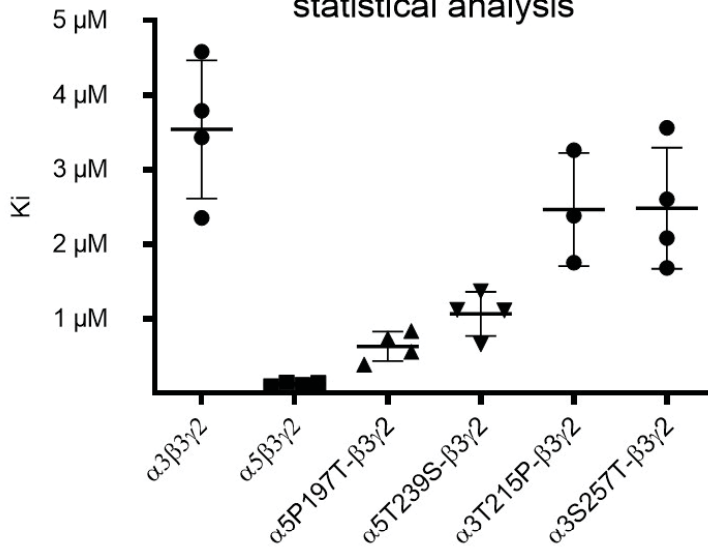

| Tukey's multiple comparisons test                                           | Mean Diff.  | 95.00% CI of diff.         | Significant? | Summary |
|-----------------------------------------------------------------------------|-------------|----------------------------|--------------|---------|
| $\alpha3\beta3\gamma2$ vs. $\alpha5\beta3\gamma2$                           | 3.417e-006  | 2.064e-006 to 4.771e-006   | Yes          | ****    |
| $\alpha3\beta3\gamma2$ vs. $\alpha5P197T\text{-}\beta3\gamma2$              | 2.909e-006  | 1.555e-006 to 4.263e-006   | Yes          | ****    |
| $\alpha3\beta3\gamma2$ vs. $\alpha5T239S\text{-}\beta3\gamma2$              | 2.473e-006  | 1.119e-006 to 3.827e-006   | Yes          | ***     |
| $\alpha3\beta3\gamma2$ vs. $\alpha3T215P\text{-}\beta3\gamma2$              | 1.074e-006  | -3.878e-007 to 2.536e-006  | No           | ns      |
| $\alpha3\beta3\gamma2$ vs. $\alpha3S257T\text{-}\beta3\gamma2$              | 1.058e-006  | -2.960e-007 to 2.411e-006  | No           | ns      |
| $\alpha5\beta3\gamma2$ vs. $\alpha5P197T\text{-}\beta3\gamma2$              | -5.080e-007 | -1.862e-006 to 8.455e-007  | No           | ns      |
| $\alpha5\beta3\gamma2$ vs. $\alpha5T239S\text{-}\beta3\gamma2$              | -9.440e-007 | -2.298e-006 to 4.095e-007  | No           | ns      |
| $\alpha5\beta3\gamma2$ vs. $\alpha3T215P\text{-}\beta3\gamma2$              | -2.343e-006 | -3.805e-006 to -8.809e-007 | Yes          | **      |
| $\alpha5\beta3\gamma2$ vs. $\alpha3S257T\text{-}\beta3\gamma2$              | -2.360e-006 | -3.713e-006 to -1.006e-006 | Yes          | ***     |
| $\alpha5P197T\text{-}\beta3\gamma2$ vs. $\alpha5T239S\text{-}\beta3\gamma2$ | -4.360e-007 | -1.790e-006 to 9.175e-007  | No           | ns      |
| $\alpha5P197T\text{-}\beta3\gamma2$ vs. $\alpha3T215P\text{-}\beta3\gamma2$ | -1.835e-006 | -3.297e-006 to -3.729e-007 | Yes          | **      |
| $\alpha5P197T\text{-}\beta3\gamma2$ vs. $\alpha3S257T\text{-}\beta3\gamma2$ | -1.852e-006 | -3.205e-006 to -4.980e-007 | Yes          | **      |
| $\alpha5T239S\text{-}\beta3\gamma2$ vs. $\alpha3T215P\text{-}\beta3\gamma2$ | -1.399e-006 | -2.861e-006 to 6.312e-008  | No           | ns      |
| $\alpha5T239S\text{-}\beta3\gamma2$ vs. $\alpha3S257T\text{-}\beta3\gamma2$ | -1.416e-006 | -2.769e-006 to -6.199e-008 | Yes          | *       |
| $\alpha3T215P\text{-}\beta3\gamma2$ vs. $\alpha3S257T\text{-}\beta3\gamma2$ | -1.667e-008 | -1.479e-006 to 1.445e-006  | No           | ns      |
